# Supplementary material for: Ginsenoside compound K plays an anti-inflammatory effect without inducing glucose metabolism disorder in adjuvant-induced arthritis rats
Source: Royal Society of Chemistry journal article supplement (doi:10.1039/d4fo01460j), 2024-01-01
Supplement: d4fo01460j1.pdf [file d4fo01460j1.pdf]

## Supplementary Figure and Table

### Supplementary Figure S1

## Model vs DEX

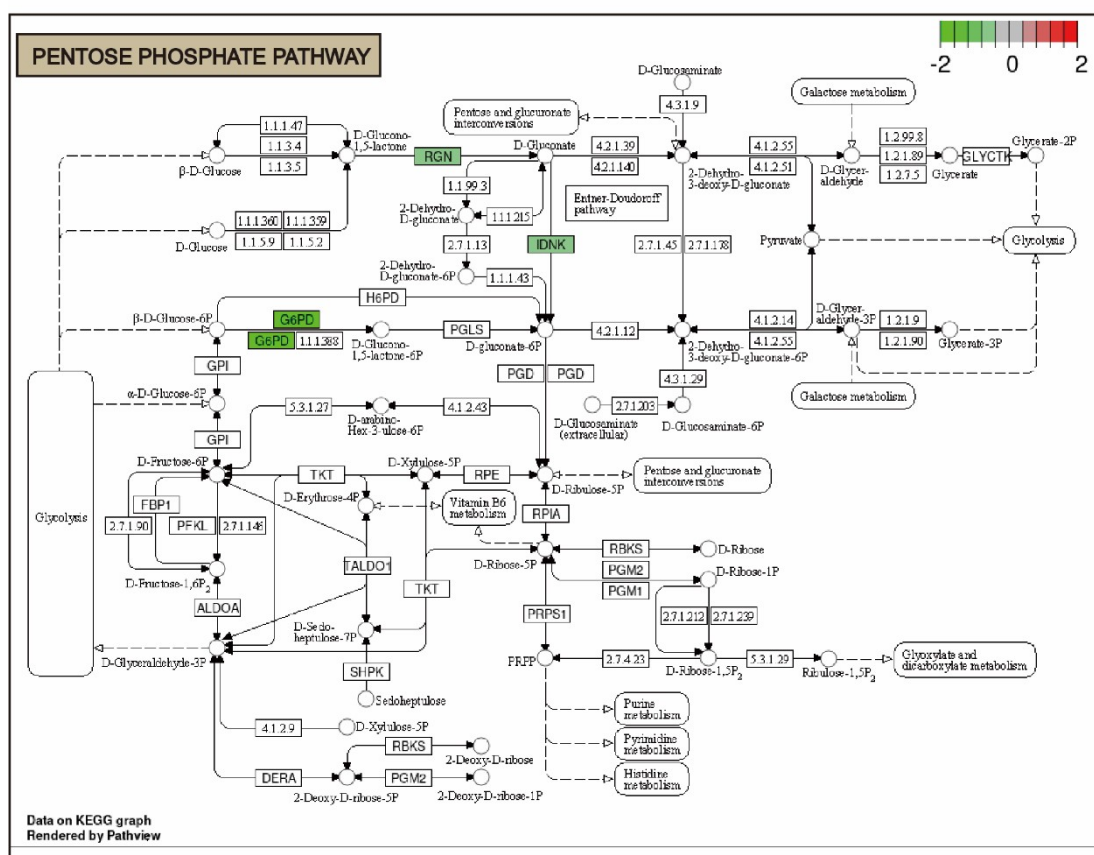

KEGG map show the genes involved in pyruvate metabolism ( $n=3$ ,  $P<0.05$ ).

### Supplementary Figure S2

# Model vs DEX

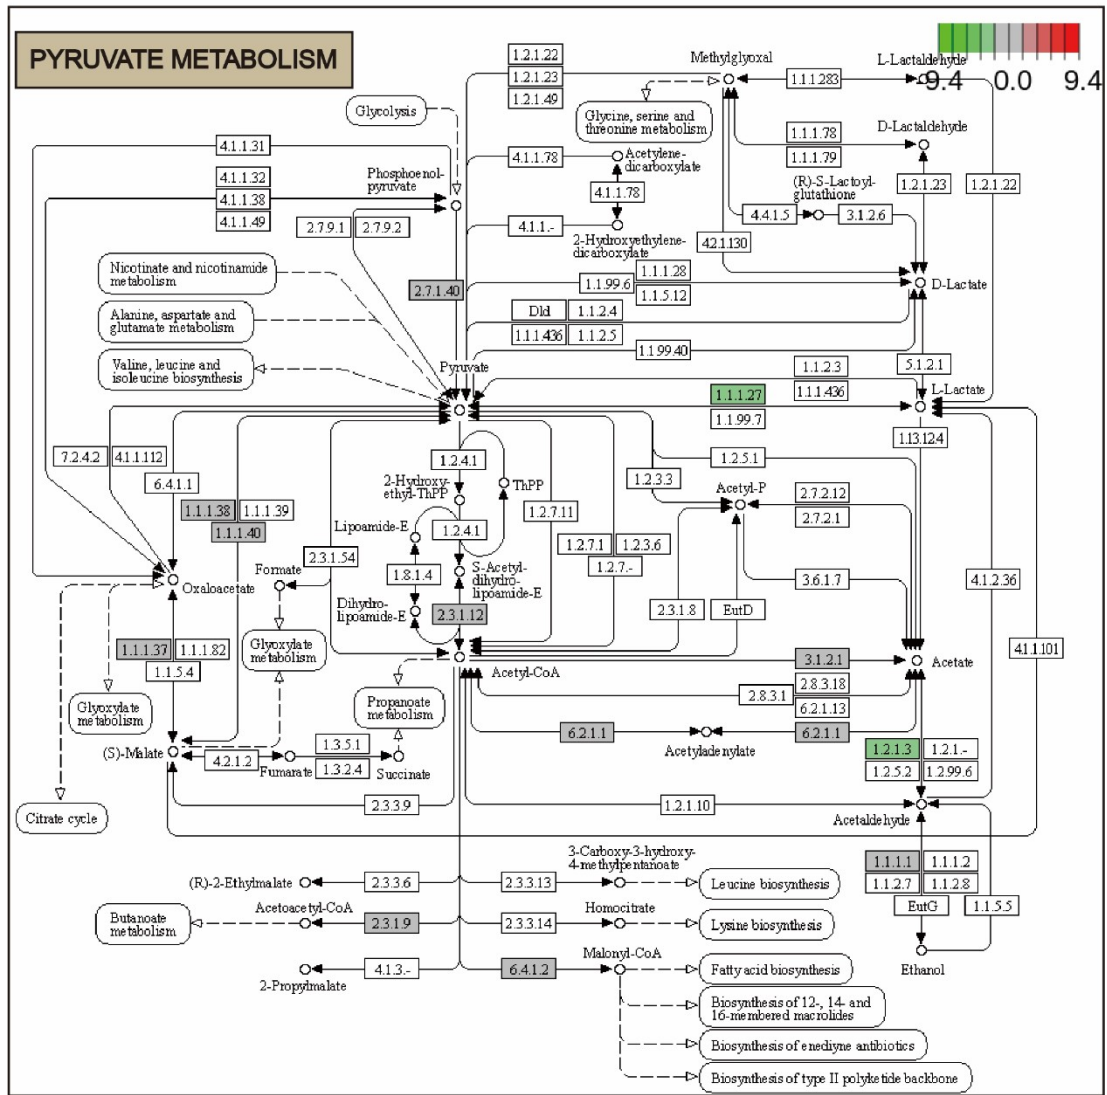

KEGG map show the genes involved in pentose phosphate pathway. ( $n=3$ ,  $P<0.05$ )

Supplementary Figure S3

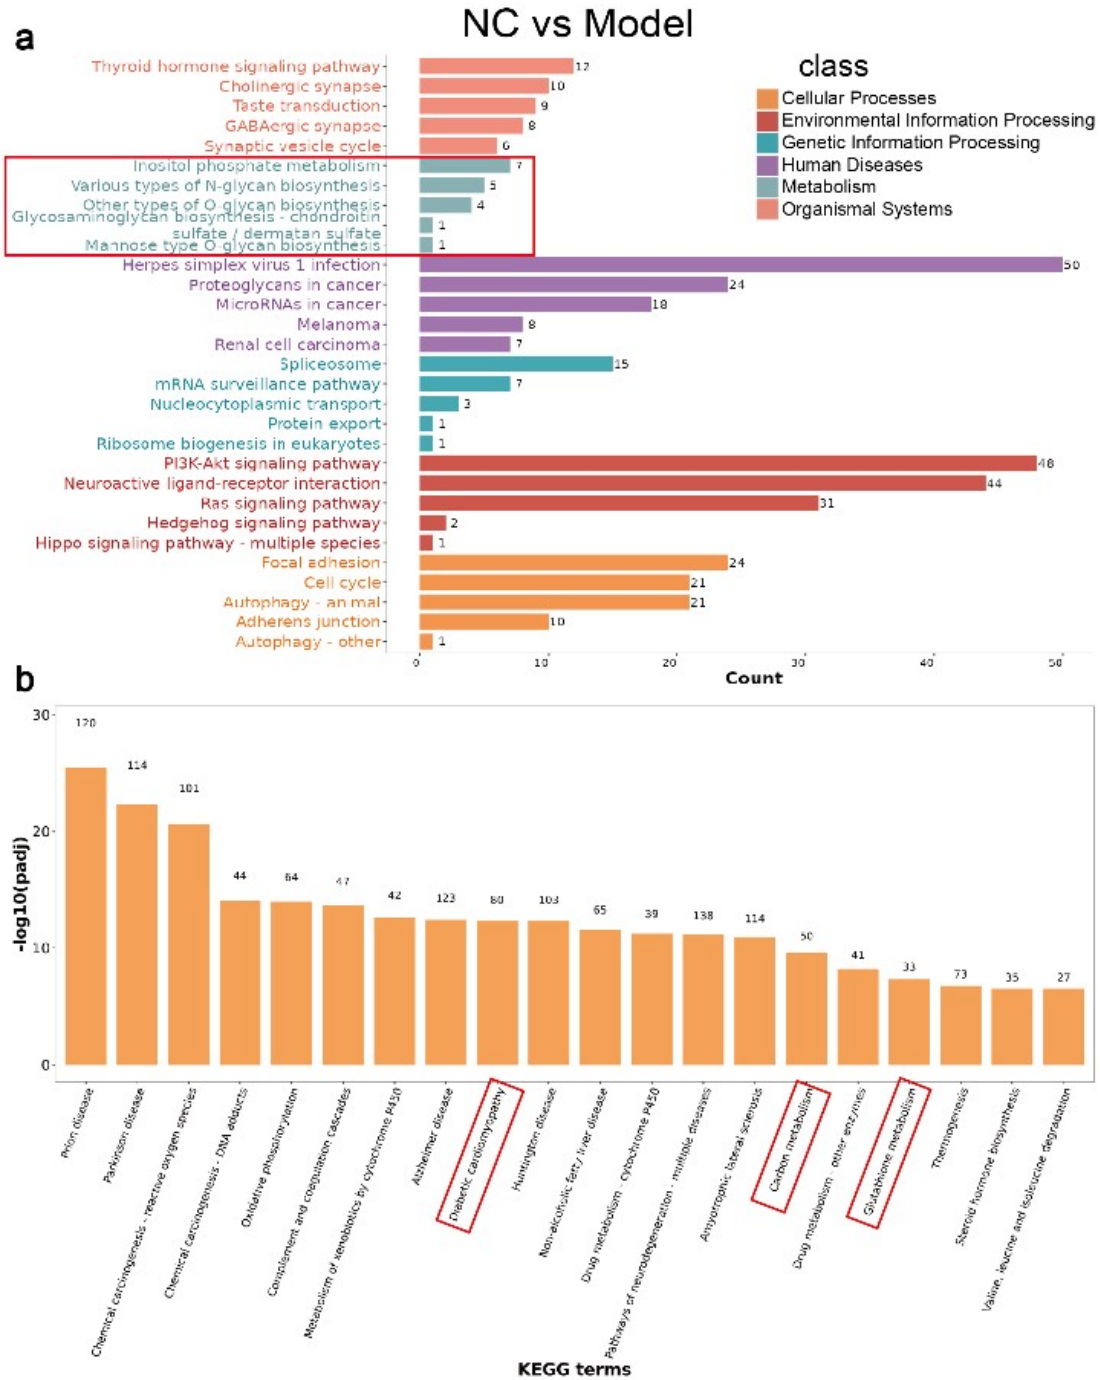

### KEGG pathway enrichment analysis in Model group

KEGG pathway enrichment analysis of the top-ranked enriched pathways according to different functional categories (a) or the top 20 pathways (b) enriched in hepatic tissue of AA rats. (n=3,  $P < 0.05$ )

**Supplementary Table1 Specific primers for quantitative real-time PCR analysis (qRT-PCR)**

| <b>Gene</b>           | <b>Forward primer (5' to 3')</b> | <b>Reverse primer (5' to 3')</b> |
|-----------------------|----------------------------------|----------------------------------|
| Rat- <i>PCK1</i>      | AACTGTTGGCTGGCTCTCACTG           | CACGGTGTCTCTCTGCTCTTGG           |
| Rat- <i>G6PD</i>      | CGCAAACAGAGTGAGCCCTTC            | GTGGCTGTTGAGGTGCTTGTAG           |
| Rat- <i>β-actin</i>   | TGTCACCAACTGGGACGATA             | GGGGTGTGAAGGTCTCAAA              |
| Human- <i>TNF-α</i>   | AGCACTGAAAGCATGATCCG             | CCGATCACTCCAAAGTGCAG             |
| Human- <i>IL-10</i>   | CCTGCCTAACATGCTTCGAG             | GGCAACCCAGGTAACCCTTA             |
| Human- <i>PCK1</i>    | CCAATGCCATCAAGACCATCCAG          | TCATCAATGCCTTCCCAGTAAACG         |
| Human- <i>G6PD</i>    | CAGCCACATGAATGCCCTCCAC           | CTTCTCCACGATGATGCGGTTCC          |
| Human- <i>RARRES2</i> | ATGCGACGGCTGCTGATCC              | GGCGGGTGCTTGTGAAATTCC            |
| Human- <i>MMP25</i>   | CGACCTGAGCCTCTGGGAAG             | CTCGGTCTTGATGCTGTTCTTGG          |
| Human- <i>FILIP1</i>  | GGCACTGTCCTTCGCTCTCC             | CCTGACACTGACTGGGTTCTC            |
| Human- <i>MATR3</i>   | GTCCAAGTCATTCCAGCAGTCATC         | TGGGTAGCAGCAGCAAGAAGG            |
| Human- <i>β-actin</i> | CCTGGCACCCAGCACAAAT              | GGGCCGGACTCGTCATAC               |

**Supplementary Table2 Statistical results of differentially expressed genes by RNA sequencing of RA-FLS**

| <b>Comparision</b>    | <b># up-regulated genes</b> | <b># down-regulated genes</b> | <b>Total</b> |
|-----------------------|-----------------------------|-------------------------------|--------------|
| <b>Control vs DEX</b> | 156                         | 159                           | 315          |
| <b>Control vs GCK</b> | 149                         | 188                           | 337          |

Notes: #P<0.05 vs. Control group (n=3) .

**Supplementary Table 3 GR target genes co-regulated by GCK and DEX in RA-FLS**

| Comparison            | # up-regulated genes |               | # down-regulated genes |                |                |
|-----------------------|----------------------|---------------|------------------------|----------------|----------------|
| <b>Control vs DEX</b> | FRRS1                | C8orf44-SGK3  |                        |                |                |
|                       | C18orf25             | SNAP25        | CBX4                   | SRCAP          | GLUL UBXXN11   |
|                       | TSNAXIP1             | <b>MATR3</b>  | PDE4C                  | FAM53B         | RHOF           |
|                       | SLC12A6              | SH3TC1        | TSC22D3                | <b>MMP25</b>   | ESR2           |
|                       | FAM171B              | <b>FILIP1</b> | TRPC3                  | <b>RARRES2</b> | SNURF          |
|                       | TAPT1                | MORC2         |                        |                |                |
| <b>Control vs GCK</b> | FRRS1                | C8orf44-SGK3  |                        |                |                |
|                       | C18orf25             | SNAP25        |                        |                |                |
|                       | TSNAXIP1             | SLC12A6       | CBX4                   | SRCAP          | UBXXN11        |
|                       | <b>MATR3</b>         | GLUL          | PDE4C                  | FAM53B         | RHOF           |
|                       |                      | SH3TC1        | <b>MMP25</b>           | ESR2           | <b>RARRES2</b> |
|                       | TSC22D3              | FAM171B       |                        |                |                |
|                       | <b>FILIP1</b>        | TRPC3         | SNURF                  |                |                |
|                       |                      | TAPT1         |                        |                |                |
|                       |                      | MORC2         |                        |                |                |
|                       |                      |               |                        |                |                |

Notes: differential genes co-regulated by DEX and GCK in the RNA-sequence of RA-FLS results from intersections taken with the target genes predicted by the chip-atlas database for NR3C1 ( $\pm 1$ k from the transcription start site TSS). Genes in bold font are genes suggested by the pubmed database to be associated with arthritis development. #P<0.05 vs. Control group (n=3) .
